# Supplementary material for: Bayesian and frequentist analysis of an Austrian genome-wide association study of colorectal cancer and advanced adenomas
Source: PubMed Central journal article supplement (PMC5716755; doi:10.18632/oncotarget.21697), 2017-10-09
Supplement: oncotarget-08-98623-s001.pdf [file oncotarget-08-98623-s001.pdf]

# Bayesian and frequentist analysis of an Austrian genome-wide association study of colorectal cancer and advanced adenomas

## SUPPLEMENTARY MATERIALS

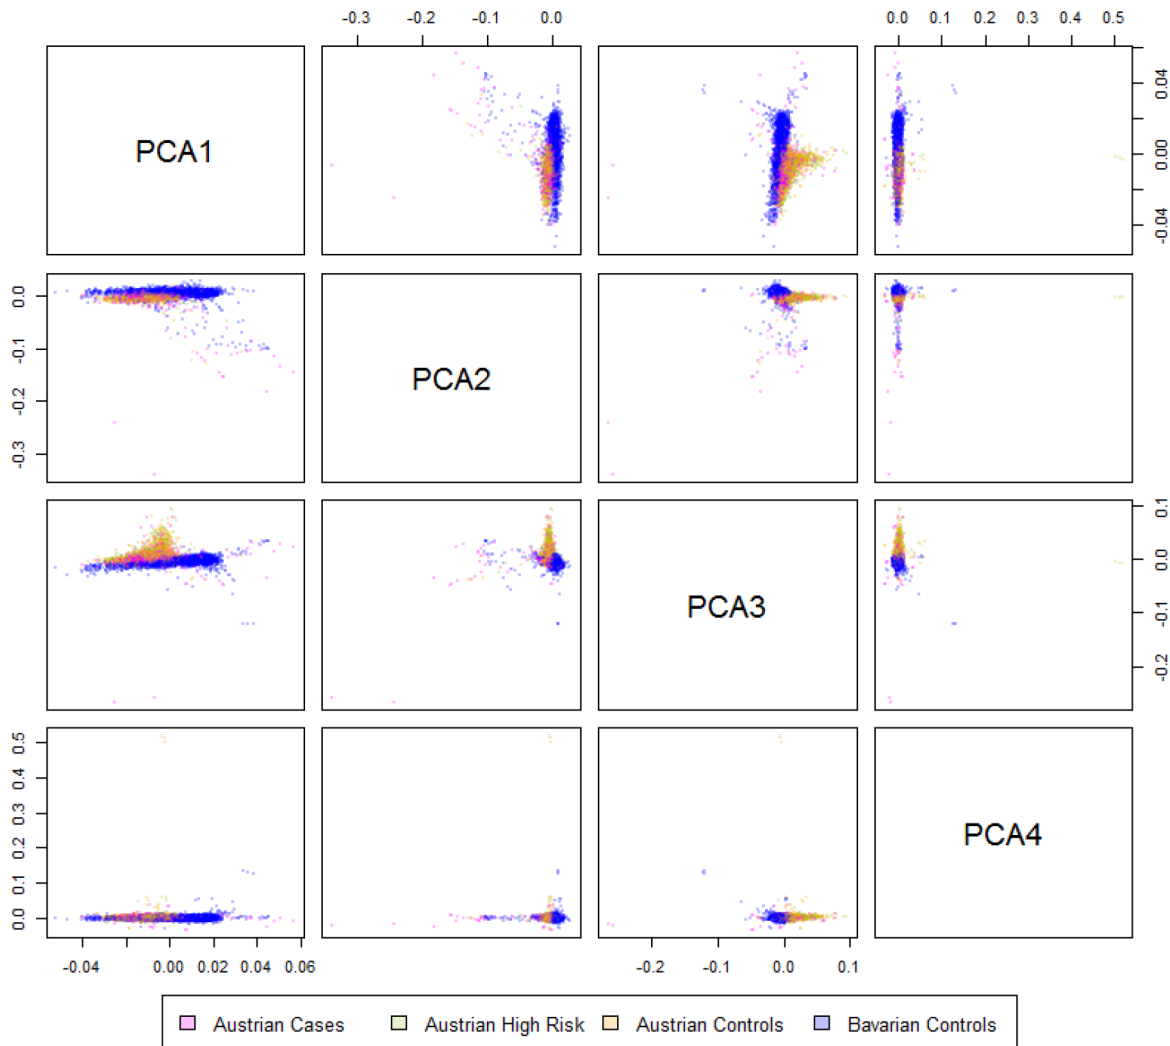

**Supplementary Figure 1: PCA plot.** The first 4 PCs are plotted against each other. Case-control status is indicated by coloured shading.

Supplementary Table 1: UICC staging and localization of post-QC samples

|                                     | CRC (A) | AA (B) |
|-------------------------------------|---------|--------|
| <b>UICC Stage</b>                   |         |        |
| <b>I</b>                            | 153     | -      |
| <b>II</b>                           | 224     | -      |
| <b>III</b>                          | 376     | -      |
| <b>IV</b>                           | 112     | -      |
| <b>X<sup>1</sup></b>                | 66      | -      |
| <b>Missing</b>                      | 47      | -      |
| <b>Location</b>                     |         |        |
| <b>Colon – distal<sup>2</sup></b>   | 296     | 288    |
| <b>Colon – proximal<sup>3</sup></b> | 257     | 215    |
| <b>Rectal<sup>4</sup></b>           | 401     | 113    |
| <b>Missing</b>                      | 24      | 20     |
| <b>Amount of polyps</b>             |         |        |
| <b>one</b>                          | -       | 436    |
| <b>two</b>                          | -       | 93     |
| <b>more than two</b>                | -       | 88     |
| <b>Missing</b>                      | -       | 19     |

CRC Colorectal cancer cases.

AA Advanced adenomas.

<sup>1</sup> UICC staging not possible (e.g. incomplete TNM or palliative surgery).

<sup>2</sup> sigmoid colon, descending colon, splenic flexure.

<sup>3</sup> transverse colon, hepatic flexure, ascending colon, cecum, appendix.

<sup>4</sup> rectum, rectosigmoid junction.

**Supplementary Table 2: The 200 top ranking SNPs for each case-control contrast.** The four different case and control groups were colorectal cancer cases (A), advanced colorectal adenomas (B), CORSA controls (C) and KORA controls (D).

See Supplementary File 1
